# Supplementary material for: Senescence as a trade-off between successful land colonisation and longevity: critical review and analysis of a hypothesis
Source: PeerJ. 2021 Nov 2;9:e12286. doi: 10.7717/peerj.12286 (PMC8570163; doi:10.7717/peerj.12286)
Supplement: Supplemental Information 1 [file peerj-09-12286-s001.docx]

**Senescence as a trade-off between successful land colonisation and longevity: Critical review and analysis of a hypothesis**

Tomasz Bilinski1, Aneta Bylak2, Krzysztof Kukuła2 and Renata Zadrag-Tecza3

1Department of Biochemistry and Cell Biology, Faculty of Biology and Agriculture, University of Rzeszów, Rzeszów, Poland

2Department of Ecology and Environmental Protection; Institute of Agricultural Sciences, Land Management and Environmental Protection, University of Rzeszów, Rzeszów, Poland

3Department of Biochemistry and Cell Biology, Institute of Biology and Biotechnology, University of Rzeszów, Rzeszów, Poland

Corresponding Author:

Renata Zadrag-Tecza

Zelwerowicza 4, 35-601 Rzeszów, Poland

Email address: [retecza@ur.edu.pl](mailto:retecza@ur.edu.pl)

**Supplementary information**

| **Table S1**. Summary table of the main life patterns of animals in clades; *- Classes: Chondrichthyes, Sarcopterygii and Actinopterygii; **- An animal capable of completely reverting to a sexually immature stage having reached sexual maturity (Bavestrello, Sommer & Sarà, 1992). | | | | |
| --- | --- | --- | --- | --- |
| **Clades** | **Main life patterns** | | | |
| **Type of senescence** | **Lifespan (years)** | **Lifespan category** | **Longevity records (years)** |
| Annelida | biologically ‘immortal’ | 2-1000 | - | *Escarpia laminate* |
| Aschelminthes | senescent | 1-10 | short | *Ascaris lumbricoides* |
| Bivalvia | negligible senescence | 10-507 | long | *Arctica islandica* |
| Bryozoa | not defined | 1-86 | intermediate | *Celleporaria fusca* |
| Cephalopoda | negligible senescence? | 1-25 | intermediate | *Nautilus pompilius* |
| Chelicerata | not defined | 0.02-43 | intermediate | *Gaius villosus* |
| Cnidaria | biologically ‘immortal’ | 5-4265-? | - | *Leiopathes glaberrima*  *Turritopsis nutricula*** |
| Crustaea | negligible senescence | 2-140 | long | *Homarus americanus* |
| Echinodermata | biologically ‘immortal’ | 8-200 | - | *Strongylocentrotus franciscanus* |
| Gastropoda | negligible senescence | 1-40 | long |  |
| Insecta | senescent | 0.06-50 | short | Isoptera - queen |
| Myriopoda | not defined | 4-10 | intermediate | *Archispirostreptus gigas* |
| Platyheminthes | biologically ‘immortal’ | 0.18-3 | - | not defined |
| Porifera | biologically ‘immortal’ | 2300-15000 | - | *Scolymastra joubini* |
| Rotifera | senescent | 0.02-0.125 | short | not defined |
| Cephalochordata | not defined | 4-8 | intermediate | *Branchiostoms lanceolatum* |
| Tunicata | not defined | 1-3 | short | *Botrylloides* |
| Myxini | negligible senescence | 17-40 | intermediate | *Eptatretus stoutii* |
| Cephalaspidomorpha | negligible senescence | 4-10 | intermediate | *Lampetra tridentata* |
| Pisces* | negligible senescence | 1-512 | long | *Somniosus microcephalus* |
| Amphibia | negligible senescence | 1.7-102 | intermediate | *Proteus anguinus* |
| Reptilia | negligible senescence | 1-200 | intermediate/long | *Sphenodon punctatus* |
| Aves | senescent | 1.5-70 | intermediate/long | *Bucorvus cafer* |
| Mammalia -terrestrial | senescent | 0.5-122.5 | intermediate | *Homo sapiens* |
| Mammalia -aquatic | senescent | 13-211 | long | *Balaena mysticetus* |
