# Supplementary material for: Senescence as a trade-off between successful land colonisation and longevity: critical review and analysis of a hypothesis
Source: PeerJ. 2021 Nov 2;9:e12286. doi: 10.7717/peerj.12286 (PMC8570163; doi:10.7717/peerj.12286)
Supplement: Supplemental Information 2 [file peerj-09-12286-s002.xlsx]

## Sheet: Table S2 A
Table S2. Summary table of reviewed literature
a) Senescence in animals vs. existing theories and explanations
Senescence: thesis & theories	Examples of papers from the sample
Symptoms of senescence	Bilinski T, Paszkiewicz T, and Zadrag-Tecza R. 2015. Energy excess is the main cause of accelerated aging of mammals. Oncotarget 6:12909-12919
	Dodig S, Čepelak I, and Pavić I. 2019. Hallmarks of senescence and aging. Biochem Med 29:5
	Ericsson G, Wallin K, Ball JP, and Broberg M. 2001. Age-related reproductive effort and senescence in free-ranging moose, Alces alces. Ecology 82:1613-1620
	Finch CE. 1990. Longevity, Senescence, and the Genome. Chicago: University of Chicago Press.
	Guerville F, De Souto Barreto P, Ader I, Andrieu S, Casteilla L, Dray C, Fazilleau N, Guyonnet S, Langin D, Liblau R, Parini A, Valet P, Vergnolle N, Rolland Y, and Vellas B. 2020. Revisiting the Hallmarks of Aging to Identify Markers of Biological Age. The Journal of Prevention of Alzheimer's Disease 7:56-64
	Herranz N, and Gil J. 2018. Mechanisms and functions of cellular senescence. J Clin Invest 128:1238-1246
	Jones OR, Scheuerlein A, Salguero-Gomez R, Camarda CG, Schaible R, Casper BB, Dahlgren JP, Ehrlen J, Garcia MB, Menges ES, Quintana-Ascencio PF, Caswell H, Baudisch A, and Vaupel JW. 2014. Diversity of ageing across the tree of life. Nature 505:169-173
	McHugh D, and Gil J. 2018. Senescence and aging: Causes, consequences, and therapeutic avenues. J Cell Biol 217:65-77
	Monaco T, Silvestre D, and Silveira PSP. 2012. Senescence in Animals: Why Evolutionary Theories Matter. Senescence:209-224
	Munoz-Espin D, and Serrano M. 2014. Cellular senescence: from physiology to pathology. Nat Rev Mol Cell Biol 15:482-496
	Niccoli T, and Partridge L. 2012. Ageing as a Risk Factor for Disease. Current Biology 22:R741-R752
	van Deursen JM. 2014. The role of senescent cells in ageing. Nature 509:439-446
	Vaupel JW, Baudisch A, Dolling M, Roach DA, and Gampe J. 2004. The case for negative senescence. Theor Popul Biol 65:339-351
Longevity phenotypes	Bilinski T, Bylak A, and Zadrag-Tecza R. 2016. Principles of alternative gerontology. Aging (Albany NY) 8:589-602
	Finch CE. 1990. Longevity, Senescence, and the Genome. Chicago: University of Chicago Press.
	Heinze J, and Schrempf A. 2008. Aging and reproduction in social insects - A mini-review. Gerontology 54:160-167
	Speakman JR. 2005. Body size, energy metabolism and lifespan. Journal of Experimental Biology 208:1717
	Reznick D, Ghalambor C, and Nunney L. 2002. The evolution of senescence in fish. Mech Ageing Dev 123:773-789
	Quesada V, Freitas-Rodriguez S, Miller J, Perez-Silva JG, Jiang ZF, Tapia W, Santiago-Fernandez O, Campos-Iglesias D, Kuderna LFK, Quinzin M, Alvarez MG, Carrero D, Beheregaray LB, Gibbs JP, Chiari Y, Glaberman S, Ciofi C, Araujo-Voces M, Mayoral P, Arango JR, Tamargo-Gomez I, Roiz-Valle D, Pascual-Torner M, Evans BR, Edwards DL, Garrick RC, Russello MA, Poulakakis N, Gaughran SJ, Rueda DO, Breto…
Selection shadow theory	Flatt T, and Partridge L. 2018. Horizons in the evolution of aging. BMC Biol 16:93
	Gavrilova NS, Gavrilov LA, Evdokushkina GN, Semyonova VG, Gavrilova AL, Evdokushkina NN, Kushnareva YE, Kroutko VN, and Andreyev A. 1998. Evolution, mutations, and human longevity: European royal and noble families. Hum Biol 70:799-804
Other evolutionary theories	Finch CE. 1990. Longevity, Senescence, and the Genome. Chicago: University of Chicago Press.
	Finch CE. 1998. Variations in senescence and longevity include the possibility of negligible senescence. J Gerontol A Biol Sci Med Sci 53:B235-239
	Jones OR, Scheuerlein A, Salguero-Gomez R, Camarda CG, Schaible R, Casper BB, Dahlgren JP, Ehrlen J, Garcia MB, Menges ES, Quintana-Ascencio PF, Caswell H, Baudisch A, and Vaupel JW. 2014. Diversity of ageing across the tree of life. Nature 505:169-173
	Kirkwood TBL. 1977. Evolution of Aging. Nature 270:301-304
	Keller L, and Genoud M. 1999. Evolutionary theories of aging. 1. The need to understand the process of natural selection. Gerontology 45:336-338
	Medawar PB. 1952. An unsolved problem of biology. London: H.K. Lewis.
	Monaco T, Silvestre D, and Silveira PSP. 2012. Senescence in Animals: Why Evolutionary Theories Matter. Senescence:209-224
	Morbey Y, xa, E, Brassil C, xa, E, Hendry A, xa, P, Associate Editor: Daniel ELP, and Editor: Jonathan BL. 2005. Rapid Senescence in Pacific Salmon. The American Naturalist 166:556-568
	Reznick D, Ghalambor C, and Nunney L. 2002. The evolution of senescence in fish. Mech Ageing Dev 123:773-789
	Williams GC. 1957. Pleiotropy, Natural-Selection, and the Evolution of Senescence. Evolution 11:398-411
	Vaupel JW, Baudisch A, Dolling M, Roach DA, and Gampe J. 2004. The case for negative senescence. Theor Popul Biol 65:339-351
Senescence and life-extending strategies	Bilinski T, Paszkiewicz T, and Zadrag-Tecza R. 2015. Energy excess is the main cause of accelerated aging of mammals. Oncotarget 6:12909-12919
	Bilinski T, Bylak A, and Zadrag-Tecza R. 2016. Principles of alternative gerontology. Aging (Albany NY) 8:589-602
	Bilinski T, Bylak A, and Zadrag-Tecza R. 2017. The budding yeast Saccharomyces cerevisiae as a model organism: possible implications for gerontological studies. Biogerontology 18:631-640
Causes of senescence	Bernard C, Compagnoni A, and Salguero-Gómez R. 2019. Testing Finch’s hypothesis: the role of organismal modularity on the escape from actuarial senescence. bioRxiv:771378
	Blagosklonny MV. 2006. Aging and immortality: quasi-programmed senescence and its pharmacologic inhibition. Cell Cycle 5:2087-2102
	Blagosklonny MV. 2012. Answering the ultimate question "what is the proximal cause of aging?". Aging (Albany NY) 4:861-877
	Flatt T, and Partridge L. 2018. Horizons in the evolution of aging. BMC Biol 16:93
	Harman D. 1956. Aging: a theory based on free radical and radiation chemistry. J Gerontol 11:298-300
	Hayflick L. 2007a. Biological aging is no longer an unsolved problem. Ann N Y Acad Sci:001
	Hayflick L. 2007b. Entropy explains aging, genetic determinism explains longevity, and undefined terminology explains misunderstanding both. PLoS Genet 3:e220
	Kirkwood TBL. 1977. Evolution of Aging. Nature 270:301-304
	Kirkwood TB, and Austad SN. 2000. Why do we age? Nature 408:233-238
	Maklakov AA, and Chapman T. 2019. Evolution of ageing as a tangle of trade-offs: energy versus function. Proc Biol Sci 286:20191604
	Martin GM, Austad SN, and Johnson TE. 1996. Genetic analysis of ageing: role of oxidative damage and environmental stresses. Nat Genet 13:25-34
	Medawar PB. 1952. An unsolved problem of biology. London: H.K. Lewis.
	Podlutsky A. 2019. Running out of developmental program and selfish anti-aging: a new hypothesis explaining the aging process in primates. Geroscience 41:243-253
	Speakman JR, Selman C, McLaren JS, and Harper EJ. 2002. Living fast, dying when? The link between aging and energetics. J Nutr 132:1583S-1597S
	Williams GC. 1957. Pleiotropy, Natural-Selection, and the Evolution of Senescence. Evolution 11:398-411
	Vaupel JW, Baudisch A, Dolling M, Roach DA, and Gampe J. 2004. The case for negative senescence. Theor Popul Biol 65:339-351

## Sheet: Table S2 B
Table S2. Summary table of reviewed literature
b) Adaptations / Animals vs. environmental and evolutionary factors / Growth & regeneration abilities
Clades	Examples of papers from the sample
Animals & plants	Boyce CK, and Lee J-E. 2010. An exceptional role for flowering plant physiology in the expansion of tropical rainforests and biodiversity. Proceedings of the Royal Society B: Biological Sciences 277:3437-3443
	Baudisch A, Salguero-Gómez R, Jones OR, Wrycza T, Mbeau-Ache C, Franco M, and Colchero F. 2013. The pace and shape of senescence in angiosperms. Journal of Ecology 101:596-606
	Mencuccini M, and Munné-Bosch S. 2017. Physiological and Biochemical Processes Related to Ageing and Senescence in Plants. In: Jones OR, Shefferson RP, and Salguero-Gómez R, eds. The Evolution of Senescence in the Tree of Life. Cambridge: Cambridge University Press, 257-283.
	Sawada H, Inoue N, and Iwano M. 2014. Sexual Reproduction in Animals and Plants: Springer, Tokyo.
Animals	Blanckenhorn WU. 2000. The evolution of body size: what keeps organisms small? Q Rev Biol 75:385-407
	Bernard C, Compagnoni A, and Salguero-Gómez R. 2019. Testing Finch’s hypothesis: the role of organismal modularity on the escape from actuarial senescence. bioRxiv:771378
	Carvalho O, and Gonçalves C. 2011. Comparative Physiology of the Respiratory System in the Animal Kingdom. The Open Biology Journal 4:35-46
	Hill RW, Wyse GA, and Anderson M. 2012. Animal Physiology, Third Edition. Animal Physiology, Third Edition:1-800
	McNab BK. 1994. Energy-Conservation and the Evolution of Flightlessness in Birds. American Naturalist 144:628-642
	Molnar C, and Gair J. 2015. Concepts of Biology: BCcampus, BC Open Textbook Project.
	Nussey DH, Coulson T, Festa-Bianchet M, and Gaillard JM. 2008. Measuring senescence in wild animal populations: towards a longitudinal approach. Functional Ecology 22:393-406
	Padian K. 2016. Doing the locomotion. Nature 530:416-417
	Reznick D, Bryant MJ, and Bashey F. 2002. r- and K-selection revisited: The role of population regulation in life-history evolution. Ecology 83:1509-1520
	Skold HN, and Obst M. 2011. Potential for clonal animals in longevity and ageing studies. Biogerontology 12:387-396
Terrestrial animals	Brainerd EL. 1999. New perspectives on the evolution of lung ventilation mechanisms in vertebrates. Experimental Biology Online: Springer-Verlag. p 1-28.
	Bray AA. 1985. The evolution of the terrestrial vertebrates: environmental and physiological considerations. Philos Trans R Soc Lond B Biol Sci 309:289-322
	Edwards D, Paul A, and Selden PA. 1992. The development of early terrestrial ecosystems. Botanical Journal of Scotland 46:337-366
	Garwood RJ, and Edgecombe GD. 2011. Early Terrestrial Animals, Evolution, and Uncertainty. Evolution: Education and Outreach 4:489-501
	Hessen DO. 2008. Solar radiation and the evolution of life. In: Bjertness E, ed. Solar radiation and human health. Oslo: The Norwegian Academy of Science and Letters 123-136.
	Hsia CC, Schmitz A, Lambertz M, Perry SF, and Maina JN. 2013. Evolution of air breathing: oxygen homeostasis and the transitions from water to land and sky. Compr Physiol 3:849-915
	Hunter P. 2007. The nature of flight. The molecules and mechanics of flight in animals. EMBO Rep 8:811-813
	Little C. 2009. The colonisation of land: Origins and adaptations of terrestrial animals. Cambridge: Cambridge University Press.
	Pough H, Janis CM, and Heiser JB. 2012. Synapsids and Sauropsids, two approaches to terrestrial life. Vertebrate life: Benjamin-Cummings Publishing Company, 267-304.
Tetrapods	Little C. 2009. The colonisation of land: Origins and adaptations of terrestrial animals. Cambridge: Cambridge University Press.
	Long JA, and Gordon MS. 2004. The greatest step in vertebrate history: a paleobiological review of the fish-tetrapod transition. Physiol Biochem Zool 77:700-719
	Oster GF, Shubin N, Murray JD, and Alberch P. 1988. Evolution and Morphogenetic Rules: The Shape of the Vertebrate Limb in Ontogeny and Phylogeny. Evolution 42:862-884
Vertebrates	Angelini F, and Ghiara G. 1984. Reproductive modes and strategies in vertebrate evolution. Bollettino di zoologia 51:121-203
	Broussard DR, Risch TS, Dobson FS, and Murie JO. 2003. Senescence and age-related reproduction of female Columbian ground squirrels. Journal of Animal Ecology 72:212-219
	Carey JR, and Judge DS. 2000. Life Spans of Mammals, Birds, Amphibians, Reptiles, and Fish. Odense: Odense University Press.
	Costanzo JP, and Lee RE. 2013. Avoidance and tolerance of freezing in ectothermic vertebrates. J Exp Biol 216:1961-1967
	de Magalhaes JP, and Costa J. 2009. A database of vertebrate longevity records and their relation to other life-history traits. J Evol Biol 22:1770-1774
	Ricklefs RE. 2010. Life-history connections to rates of aging in terrestrial vertebrates. Proc Natl Acad Sci U S A 107:10314-10319
	Snyder GK, and Sheafor BA. 1999. Red blood cells: Centerpiece in the evolution of the vertebrate circulatory system. American Zoologist 39:189-198
Humans	Croft DP, Brent LJ, Franks DW, and Cant MA. 2015. The evolution of prolonged life after reproduction. Trends in Ecology & Evolution 30:407-416
	Lipner SR, and Scher RK. 2017. Nail Growth Evaluation and Factors Affecting Nail Growth. In: Humbert P, Fanian F, Maibach HI, and Agache P, eds. Agache's Measuring the Skin: Non-invasive Investigations, Physiology, Normal Constants. Cham: Springer International Publishing, 867-881
	Niemitz C, Nibbrig M, and Zacher V. 2008. Human ears grow throughout the entire lifetime according to complicated and sexually dimorphic patterns--conclusions from a cross-sectional analysis. Anthropologischer Anzeiger; Bericht uber die biologisch-anthropologische Literatur 65:391-413
	Wilson AS, and Tobin DJ. 2010. Hair After Death. In: Trüeb RM, and Tobin DJ, eds. Aging Hair. Berlin, Heidelberg: Springer Berlin Heidelberg, 249-261.
Mammals	Clapham ME, and Karr JA. 2012. Environmental and biotic controls on the evolutionary history of insect body size. Proc Natl Acad Sci U S A 109:10927-10930
	Gaillard JM, and Lemaitre JF. 2017. The Williams' legacy: A critical reappraisal of his nine predictions about the evolution of senescence. Evolution 71:2768-2785
	Gerkema MP, Davies WI, Foster RG, Menaker M, and Hut RA. 2013. The nocturnal bottleneck and the evolution of activity patterns in mammals. Proc Biol Sci 280:20130508
	Kemp TS. 2006. The origin of mammalian endothermy: a paradigm for the evolution of complex biological structure. Zoological Journal of the Linnean Society 147:473-488
	Klevezal GA. 2010. Dynamics of incisor growth and daily increments on the incisor surface in three species of small rodents. Biology Bulletin 37:836-845
	Luo ZX. 2007. Transformation and diversification in early mammal evolution. Nature 450:1011-1019
	Maina JN. 2000. What it takes to fly: the structural and functional respiratory refinements in birds and bats. J Exp Biol 203:3045-3064
	Miquel J, Economos AC, and Bensch KG. 1981. Insect vs. Mammalian Aging. In: Johnson JE, ed. Aging and Cell Structure: Volume 1. Boston, MA: Springer US, 347-379.
	Oftedal OT. 2002. The mammary gland and its origin during synapsid evolution. J Mammary Gland Biol Neoplasia 7:225-252
	Rilling JK, and Young LJ. 2014. The biology of mammalian parenting and its effect on offspring social development. Science 345:771-776
	Sander PM, Christian A, Clauss M, Fechner R, Gee CT, Griebeler EM, Gunga HC, Hummel J, Mallison H, Perry SF, Preuschoft H, Rauhut OWM, Remes K, Tutken T, Wings O, and Witzel U. 2011. Biology of the sauropod dinosaurs: the evolution of gigantism. Biological Reviews 86:117-155
	Turbill C, Bieber C, and Ruf T. 2011. Hibernation is associated with increased survival and the evolution of slow life histories among mammals. Proceedings of the Royal Society B-Biological Sciences 278:3355-3363
Marine mammals	Croft DP, Brent LJ, Franks DW, and Cant MA. 2015. The evolution of prolonged life after reproduction. Trends in Ecology & Evolution 30:407-416
	Tarpley RJ, and Hillmann DJ. 1998. Observations on ovary morphology, fetal size and functional correlates in the bowhead whale Balaena mysticetus: Department of Wildlife Management, North Slope Borough.
	Thewissen JGM, Cooper LN, George JC, and Bajpai S. 2009. From Land to Water: the Origin of Whales, Dolphins, and Porpoises. Evolution: Education and Outreach 2:272-288
Birds	Altshuler DL, and Dudley R. 2006. The physiology and biomechanics of avian flight at high altitude. Integrative and Comparative Biology 46:62-71
	Andrews CB, Mackenzie SA, and Gregory TR. 2009. Genome size and wing parameters in passerine birds. Proc Biol Sci 276:55-61
	Bairlein F, Fritz J, Scope A, Schwendenwein I, Stanclova G, van Dijk G, Meijer HA, Verhulst S, and Dittami J. 2015. Energy Expenditure and Metabolic Changes of Free-Flying Migrating Northern Bald Ibis. PLoS One 10:e0134433
	Bruderer B, Peter D, Boldt A, and Liechti F. 2010. Wing-beat characteristics of birds recorded with tracking radar and cine camera. Ibis 152:272-291
	Dudley R, Byrnes G, Yanoviak SP, Borrell B, Brown RM, and McGuire JA. 2007. Gliding and the functional origins of flight: Biomechanical novelty or necessity? Annual Review of Ecology Evolution and Systematics 38:179-201
	Dumont ER. 2010. Bone density and the lightweight skeletons of birds. Proc Biol Sci 277:2193-2198
	Hackett SJ, Kimball RT, Reddy S, Bowie RC, Braun EL, Braun MJ, Chojnowski JL, Cox WA, Han KL, Harshman J, Huddleston CJ, Marks BD, Miglia KJ, Moore WS, Sheldon FH, Steadman DW, Witt CC, and Yuri T. 2008. A phylogenomic study of birds reveals their evolutionary history. Science 320:1763-1768
	Heers AM, Baier DB, Jackson BE, and Dial KP. 2016. Flapping before Flight: High Resolution, Three-Dimensional Skeletal Kinematics of Wings and Legs during Avian Development. PLoS One 11
	Hill RW, Wyse GA, and Anderson M. 2012. Animal Physiology, Third Edition. Animal Physiology, Third Edition:1-800
	Jourdain E, Gauthier-Clerc M, Bicout DJ, and Sabatier P. 2007. Bird migration routes and risk for pathogen dispersion into western Mediterranean wetlands. Emerg Infect Dis 13:365-372
	Maina JN. 2000. What it takes to fly: the structural and functional respiratory refinements in birds and bats. J Exp Biol 203:3045-3064
	Maina JN. 2015. The design of the avian respiratory system: development, morphology and function. Journal of Ornithology 156:S41-S63
	McNab BK. 1994. Energy-Conservation and the Evolution of Flightlessness in Birds. American Naturalist 144:628-642
	Meyers RA, and Stakebake EF. 2005. Anatomy and histochemistry of spread-wing posture in birds. 3. Immunohistochemistry of flight muscles and the "shoulder lock" in albatrosses. Journal of Morphology 263:12-29
	Møller AP. 2007. Senescence in relation to latitude and migration in birds. J Evol Biol 20:750-757
	Newman BG. 1958. Soaring and Gliding Flight of the Black Vulture. Journal of Experimental Biology 35:280
	Pennycuick CJ. 1973. The Soaring Flight of Vultures. Scientific American 229:102-109
	Puttick MN, Thomas GH, and Benton MJ. 2014. High Rates of Evolution Preceded the Origin of Birds. Evolution 68:1497-1510
	Roots C. 2006. Flightless birds. London: Greenwood Press.
	Savile OBO. 1957. Adaptive Evolution in the avian wing. 11:212-224
	Schmaljohann H, and Liechti F. 2009. Adjustments of wingbeat frequency and air speed to air density in free-flying migratory birds. Journal of Experimental Biology 212:3633
	Vincze O, Vágási CI, Pap PL, Palmer C, and Møller AP. 2019. Wing morphology, flight type and migration distance predict accumulated fuel load in birds. J Exp Biol 222:jeb183517
Reptiles	Cayuela H, Akani GC, Hema EM, Eniang EA, Amadi N, Ajong SN, Dendi D, Petrozzi F, and Luiselli L. 2019. Life history and age-dependent mortality processes in tropical reptiles. Biological Journal of the Linnean Society 128:251-262
	Garwood RJ, and Edgecombe GD. 2011. Early Terrestrial Animals, Evolution, and Uncertainty. Evolution: Education and Outreach 4:489-501
	Pough H, Janis CM, and Heiser JB. 2012. Synapsids and Sauropsids, two approaches to terrestrial life. Vertebrate life: Benjamin-Cummings Publishing Company, 267-304
	Quesada V, Freitas-Rodriguez S, Miller J, Perez-Silva JG, Jiang ZF, Tapia W, Santiago-Fernandez O, Campos-Iglesias D, Kuderna LFK, Quinzin M, Alvarez MG, Carrero D, Beheregaray LB, Gibbs JP, Chiari Y, Glaberman S, Ciofi C, Araujo-Voces M, Mayoral P, Arango JR, Tamargo-Gomez I, Roiz-Valle D, Pascual-Torner M, Evans BR, Edwards DL, Garrick RC, Russello MA, Poulakakis N, Gaughran SJ, Rueda DO, Breto…
	Rutland CS, Cigler P, and Kubale Dvojmoč V. 2019. Reptilian skin and its special histological structures. In: Rutland CS, and Kubale Dvojmoč V, eds. Veterinary anatomy and physiology: InTech, 1-21.
	Sander PM, Christian A, Clauss M, Fechner R, Gee CT, Griebeler EM, Gunga HC, Hummel J, Mallison H, Perry SF, Preuschoft H, Rauhut OWM, Remes K, Tutken T, Wings O, and Witzel U. 2011. Biology of the sauropod dinosaurs: the evolution of gigantism. Biological Reviews 86:117-155
	Sparkman AM, Arnold SJ, and Bronikowski AM. 2007. An empirical test of evolutionary theories for reproductive senescence and reproductive effort in the garter snake Thamnophis elegans. Proc Biol Sci 274:943-950
	Woodward HN, Horner JR, and Farlow JO. 2011. Osteohistological Evidence for Determinate Growth in the American Alligator. Journal of Herpetology 45:339-342, 334
Dinosaurs	Archibald JD. 2012. Dinosaur Extinction: Past and Present Perceptions. In: Brett-Surman MK, Holtz TR, Farlow JO, and Walter B, eds. The Complete Dinosaur. Bloomington: Indiana Press, 1027-1038
	Benton M. 1989. Scientific methodologies in collision : the history of the study of the extinction of the dinosaurs. Evolutionary Biology-new York 24:371-400
	Woodward HN, Freedman Fowler EA, Farlow JO, and Horner JR. 2015. Maiasaura, a model organism for extinct vertebrate population biology: a large sample statistical assessment of growth dynamics and survivorship. Paleobiology 41:503-527
	Woodward HN, Horner JR, and Farlow JO. 2011. Osteohistological Evidence for Determinate Growth in the American Alligator. Journal of Herpetology 45:339-342, 334
Amphibians	Burggren WW, and Infantino RL. 1994. The Respiratory Transition from Water to Air-Breathing during Amphibian Metamorphosis. American Zoologist 34:238-246
	Hutchison VH. 2008. Amphibians: Lungs' lift lost. Current Biology 18:R392-R393
	Snyder GK, and Sheafor BA. 1999. Red blood cells: Centerpiece in the evolution of the vertebrate circulatory system. American Zoologist 39:189-198
	Thomson K, and Bossy K. 1970. Adaptive trends and relationships in early Amphibia. Forma et functio 3:7-31
	Whitford WG. 1973. The Effects of Temperature on Respiration in the Amphibia. American Zoologist 13:505-512
Fish	Andrews AH, Tracey DM, and Dunn MR. 2009. Lead–radium dating of orange roughy (Hoplostethus atlanticus): validation of a centenarian life span. Canadian Journal of Fisheries and Aquatic Sciences 66:1130-1140
	Nielsen J, Hedeholm RB, Heinemeier J, Bushnell PG, Christiansen JS, Olsen J, Ramsey CB, Brill RW, Simon M, Steffensen KF, and Steffensen JF. 2016. Eye lens radiocarbon reveals centuries of longevity in the Greenland shark (Somniosus microcephalus). Science 353:702-704
	Woodhead AD. 1998. Aging, the fishy side: an appreciation of Alex Comfort's studies. Experimental Gerontology 33:39-51
Arthropods	Costa FG, and Perez-Miles F. 2002. Reproductive biology of Uruguayan theraphosids (Araneae, Mygalomorphae). Journal of Arachnology 30:571-587
	Gonçalves F. 2018. Terrestrial. In: Vonk J, and Shackelford T, eds. Encyclopedia of Animal Cognition and Behavior. Cham: Springer International Publishing, 1-5
	Rolfe WDI. 1985. Early Terrestrial Arthropods - a Fragmentary Record. Philosophical Transactions of the Royal Society of London Series B-Biological Sciences 309:207-&
Insects	Abdelwahab AH, Michaud JP, Bayoumy MH, Awadalla SS, and El-Gendy M. 2018. Limb ablation and regeneration in Harmonia axyridis: costs for regenerators, but benefits for their progeny. Entomologia Experimentalis Et Applicata 166:124-130
	Alves RJV, Costa LAA, Soares A, Silva NG, and Pinto Â P. 2019. Open ocean nocturnal insect migration in the Brazilian South Atlantic with comments on flight endurance. PeerJ 18
	Berger D, Walters R, and Gotthard K. 2008. What limits insect fecundity? Body size- and temperature-dependent egg maturation and oviposition in a butterfly. Functional Ecology 22:523-529
	Compton SG, Bullock JM, Kenward RE, and Hails RS. 2002. Sailing with the wind: dispersal by small flying insects
	Cristoffer C, and Peres CA. 2003. Elephants versus butterflies: the ecological role of large herbivores in the evolutionary history of two tropical worlds. Journal of Biogeography 30:1357-1380
	Davies I. 1974. Effect of Age and Diet on Ultrastructure of Hymenopteran Flight-Muscle. Experimental Gerontology 9:215-&
	Giraldo YM, Kamhi JF, Fourcassie V, Moreau M, Robson SK, Rusakov A, Wimberly L, Diloreto A, Kordek A, and Traniello JF. 2016. Lifespan behavioural and neural resilience in a social insect. Proc Biol Sci 283
	Hanken J, and Wake DB. 1993. Miniaturization of Body-Size - Organismal Consequences and Evolutionary Significance. Annual Review of Ecology and Systematics 24:501-519
	Harrison JF, Kaiser A, and VandenBrooks JM. 2010. Atmospheric oxygen level and the evolution of insect body size. Proceedings of the Royal Society B-Biological Sciences 277:1937-1946
	Heinze J, and Schrempf A. 2008. Aging and reproduction in social insects - A mini-review. Gerontology 54:160-167
	Jacobus LM, Macadam CR, and Sartori M. 2019. Mayflies (Ephemeroptera) and Their Contributions to Ecosystem Services. Insects 10
	Keller L. 1998. Queen lifespan and colony characteristics in ants and termites. Insectes Sociaux 45:235-246
	Lindstedt C, Murphy L, and Mappes J. 2019. Antipredator strategies of pupae: how to avoid predation in an immobile life stage? Philos Trans R Soc Lond B Biol Sci 374:20190069
	McMahon DP, and Hayward A. 2016. Why grow up? A perspective on insect strategies to avoid metamorphosis. Ecological Entomology 41:505-515
	Molnar C, and Gair J. 2015. Concepts of Biology: BCcampus, BC Open Textbook Project
	Moussian B. 2010. Recent advances in understanding mechanisms of insect cuticle differentiation. Insect Biochemistry and Molecular Biology 40:363-375
	Nation JL. 2005. Tracheal System and Respiratory Gas Exchange. Encyclopedia of Entomology. Dordrecht: Springer Netherlands, 2276-2280
	Nöthiger R. 1972. The Larval Development of Imaginal Disks. In: Ursprung H, and Nöthiger R, eds. The Biology of Imaginal Disks Results and Problems in Cell Differentiation (A Series of Topical Volumes in Developmental Biology). Berlin, Heidelberg: Springer, 1-34
	Parle E, Dirks JH, and Taylor D. 2016. Bridging the gap: wound healing in insects restores mechanical strength by targeted cuticle deposition. J R Soc Interface 13
	Pass G. 2018. Beyond aerodynamics: The critical roles of the circulatory and tracheal systems in maintaining insect wing functionality. Arthropod Structure & Development 47:391-407
	Polilov AA. 2016. At the Size Limit - Effects of Miniaturization in Insects. Springer, Cham
	Rolff J, Johnston PR, and Reynolds S. 2019. Complete metamorphosis of insects. Philos Trans R Soc Lond B Biol Sci 374:20190063
	Rosenheim JA, Jepsen SJ, Matthews CE, Smith DS, and Rosenheim MR. 2008. Time limitation, egg limitation, the cost of oviposition, and lifetime reproduction by an insect in nature. American Naturalist 172:486-496
	Welch CH. 1998. Chapter 37: Shortest Reproductive Life. Book of Insect Records: University of Florida
	Yanoviak SP, Kaspari M, and Dudley R. 2009. Gliding hexapods and the origins of insect aerial behaviour. Biol Lett 5:510-512
Cnidarians	Reitzel AM, Stefanik D, and Finnerty JR. 2011. Asexual reproduction in Cnidaria: Comparative developmental processes and candidate mechanisms. Mechanisms of Life History Evolution: The Genetics and Physiology of Life History Traits and Trade-Offs:101-113
	Skold HN, and Obst M. 2011. Potential for clonal animals in longevity and ageing studies. Biogerontology 12:387-396
Molluscs	Anderson RC, Wood JB, and Byrne RA. 2002. Octopus senescence: the beginning of the end. J Appl Anim Welf Sci 5:275-283
	Budelmann BU. 1998. Autophagy in Octopus. In: Payne AIL, Lipinski MR, Clarke MR, and Roeleveld MAC, eds. Cephalopod biodiversity, ecology and evolution: South Afri J Mar Sci, 101-108
	Gonçalves F. 2018. Terrestrial. In: Vonk J, and Shackelford T, eds. Encyclopedia of Animal Cognition and Behavior. Cham: Springer International Publishing, 1-5
	Gruber H, Wessels W, Boynton P, Xu JZ, Wohlgemuth S, Leeuwenburgh C, Qi WB, Austad SN, Schaible R, and Philipp EER. 2015. Age-related cellular changes in the long-lived bivalve A. islandica. Age 37
	Roumbedakis K, and Guerra Á. 2019. Cephalopod Senescence and Parasitology. In: Gestal C, Pascual S, Guerra Á, Fiorito G, and Vieites JM, eds. Handbook of Pathogens and Diseases in Cephalopods. Cham: Springer International Publishing, 207-211
Invertebrates	Anderson RC, Wood JB, and Byrne RA. 2002. Octopus senescence: the beginning of the end. J Appl Anim Welf Sci 5:275-283
	Moore J. 2006. An Introduction to the Invertebrates. Cambridge: Cambridge University Press
	Skold HN, and Obst M. 2011. Potential for clonal animals in longevity and ageing studies. Biogerontology 12:387-396
